# Supplementary figures and images for: Attention stabilizes the shared gain of V4 populations
Source: eLife journal article supplement (doi:10.7554/elife.08998), 2015-11-02

Figure 8—figure supplement 1

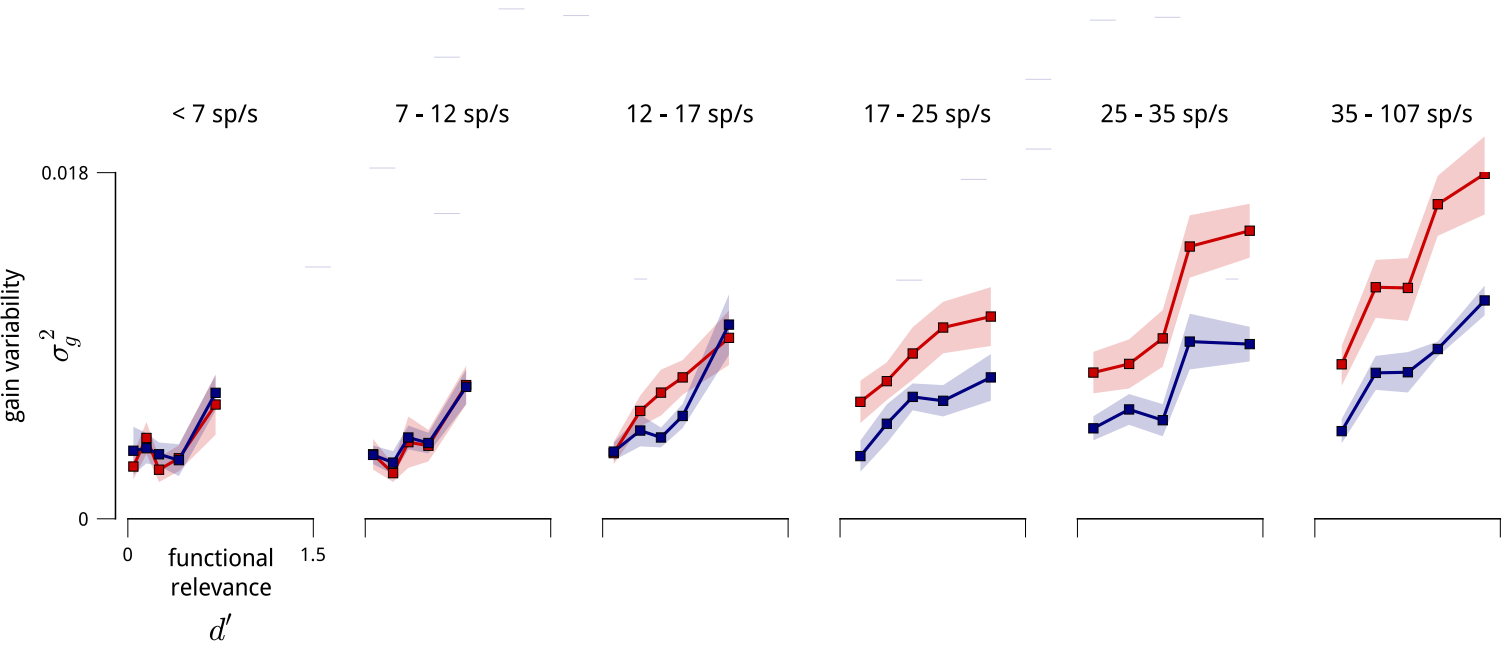

Supplement: supp [file elife-08998-supp-v1.zip]

Figure 2—figure supplement 1

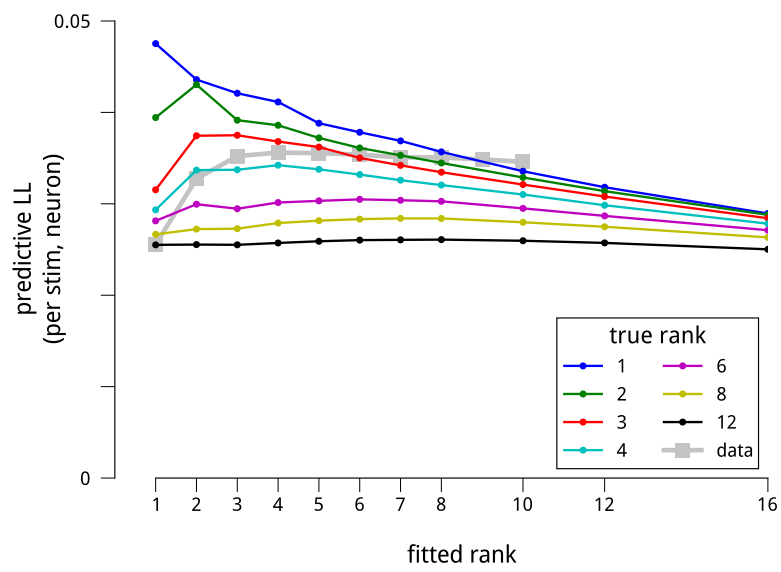

Supplement: supp [file elife-08998-supp-v1.zip]

Figure 1—figure supplement 1

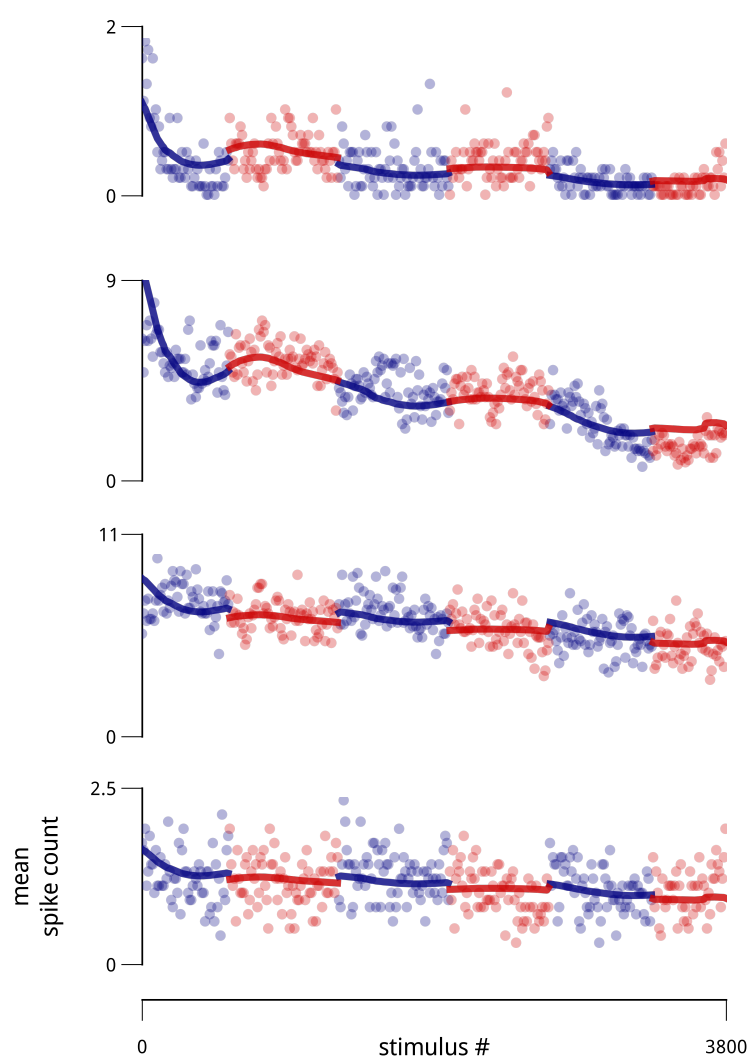

Supplement: supp [file elife-08998-supp-v1.zip]

Figure 2—figure supplement 3

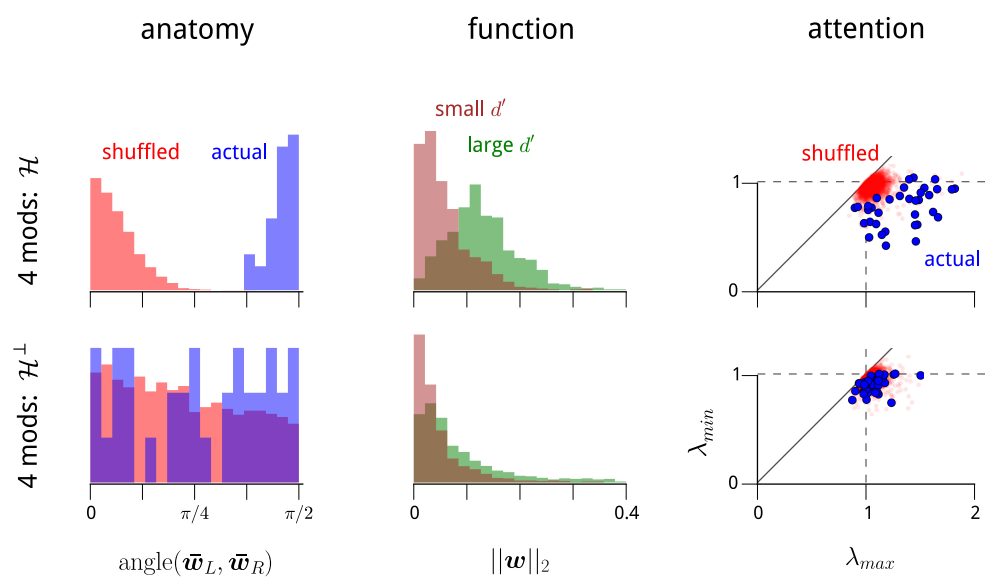

Supplement: supp [file elife-08998-supp-v1.zip]

Figure 2—figure supplement 4

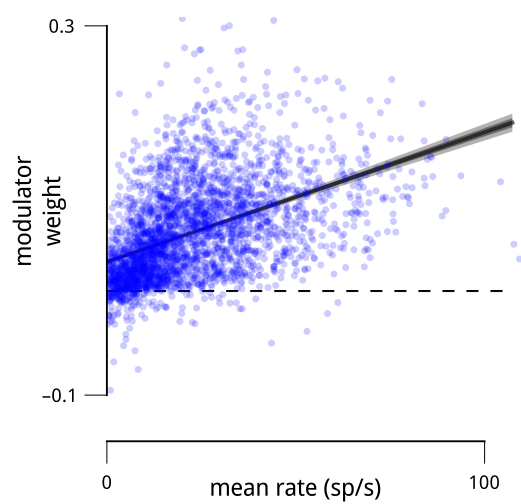

Supplement: supp [file elife-08998-supp-v1.zip]

Figure 2—figure supplement 2

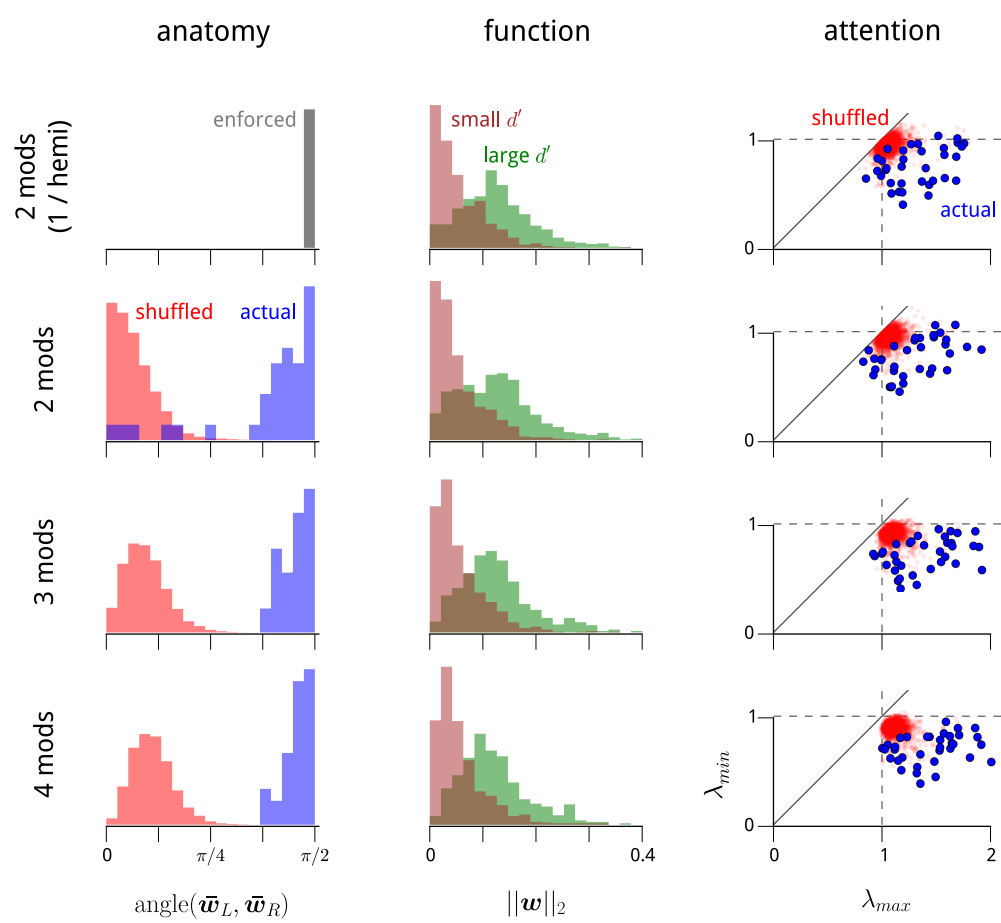

Supplement: supp [file elife-08998-supp-v1.zip]

Figure 7—figure supplement 1

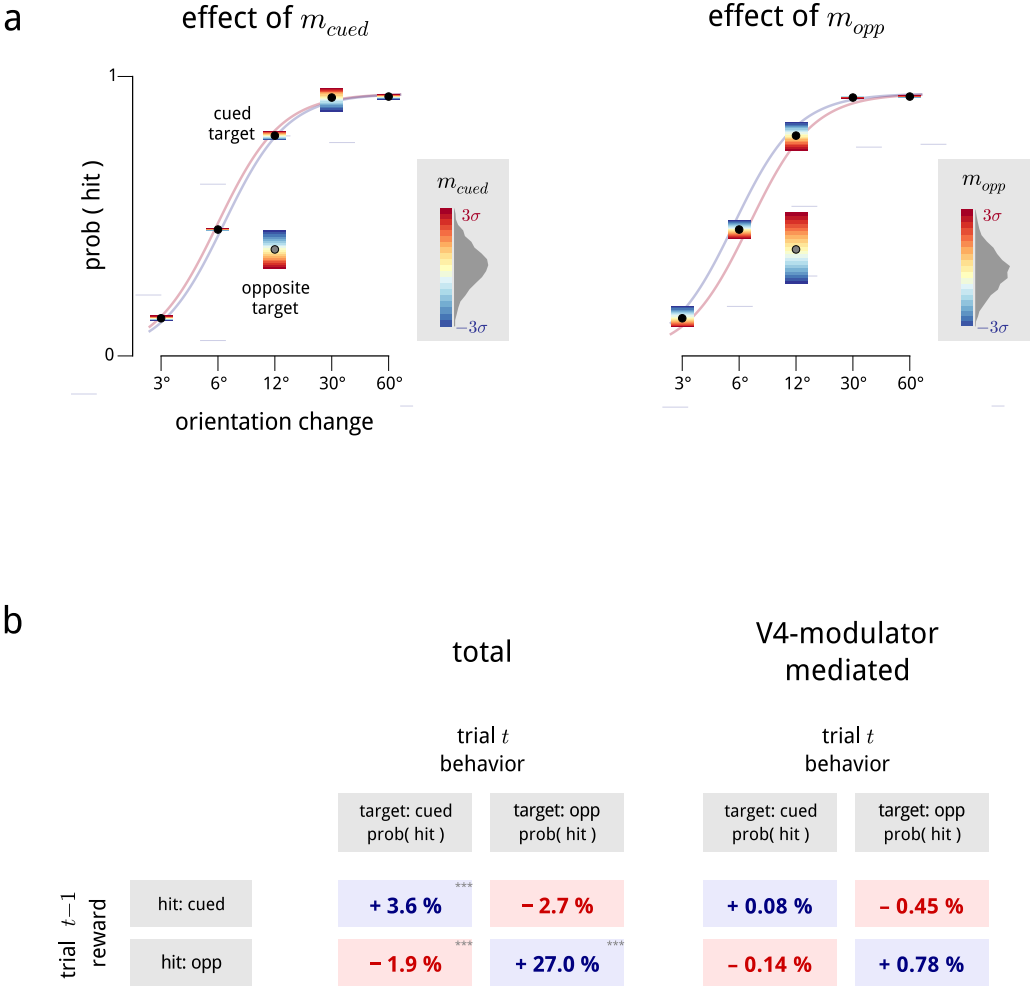

Supplement: supp [file elife-08998-supp-v1.zip]

Figure 1—figure supplement 2

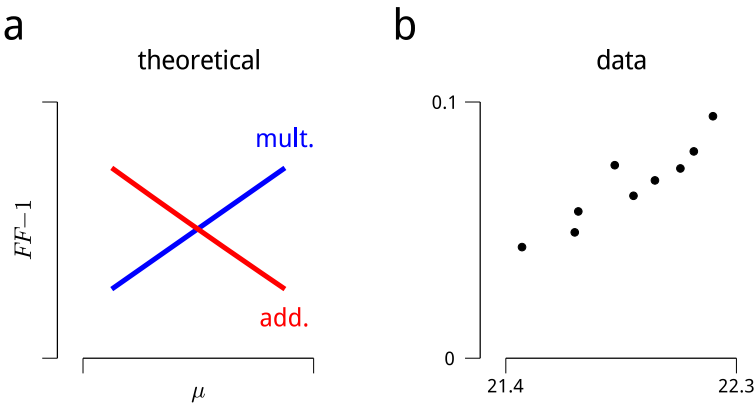

Supplement: supp [file elife-08998-supp-v1.zip]

Figure 5—figure supplement 1

a

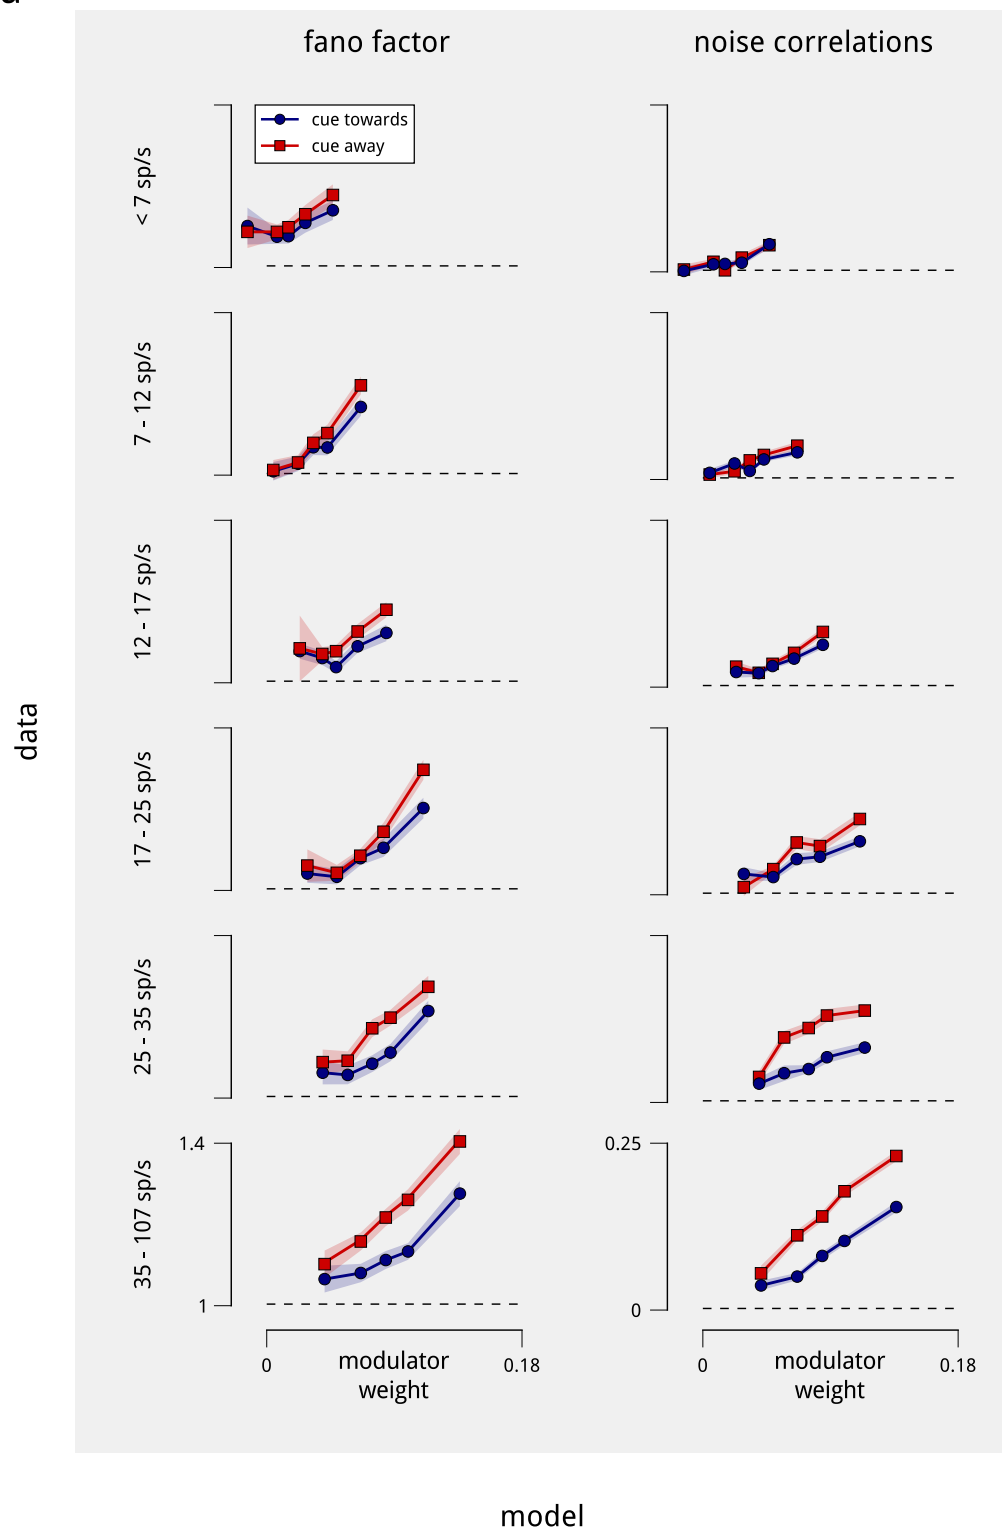

b

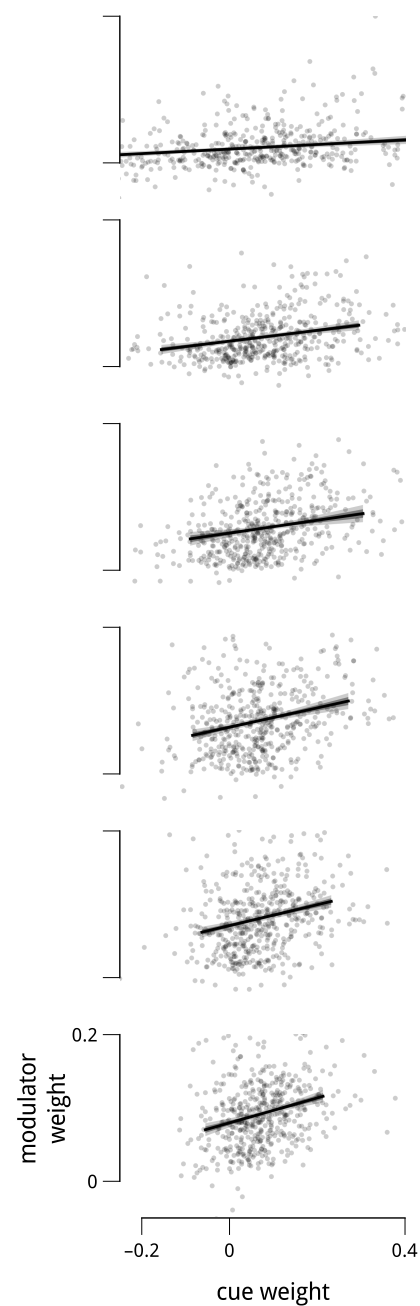

Supplement: supp [file elife-08998-supp-v1.zip]
